1 **Impaired competence in flagellar mutants of *Bacillus subtilis* is connected to the regulatory**  
2 **network governed by DegU**

3

4 Theresa Hölscher<sup>1,\*</sup>, Tina Schiklang<sup>1,\*</sup>, Anna Dragoš<sup>1</sup>, Anne-Kathrin Dietel<sup>2,3</sup>, Christian Kost<sup>2,3</sup>, Ákos T.  
5 Kovács<sup>1,4#</sup>

6

7 <sup>1</sup> Terrestrial Biofilms Group, Institute of Microbiology, Friedrich Schiller University Jena, Jena,  
8 Germany

9 <sup>2</sup> Experimental Ecology and Evolution Group, Department of Bioorganic Chemistry, Max Planck  
10 Institute for Chemical Ecology, Jena, Germany

11 <sup>3</sup> Department of Ecology, School of Biology/Chemistry, University of Osnabrück, Osnabrück,  
12 Germany

13 <sup>4</sup> Bacterial Interactions and Evolution Group, Department of Biotechnology and Biomedicine,  
14 Technical University of Denmark, Kgs Lyngby, Denmark

15

16 \* Contributed equally

17 # For correspondence. Email [atkovacs@dtu.dk](mailto:atkovacs@dtu.dk)

18

19 **Running title:** Hindered competence by lack of motility

20

21 **Keywords:** flagella, *Bacillus subtilis*, competence, phosphorylation, viscosity

22 **Summary**

23 The competent state is a developmentally distinct phase, in which bacteria are able to take up and  
24 integrate exogenous DNA into their genome. *Bacillus subtilis* is one of the naturally competent  
25 bacterial species and the domesticated laboratory strain 168 is easily transformable. In this study,  
26 we report a reduced transformation frequency of *B. subtilis* mutants lacking functional and  
27 structural flagellar components. This includes *hag*, the gene encoding the flagellin protein forming  
28 the filament of the flagellum. We confirm that the observed decrease of the transformation  
29 frequency is due to reduced expression of competence genes, particularly of the main competence  
30 regulator *comK*. The impaired competence is due to an increase in the phosphorylated form of the  
31 response regulator DegU, which is involved in regulation of both flagellar motility and competence.  
32 Altogether, our study identified a close link between motility and natural competence in *B. subtilis*  
33 suggesting that hindrance in motility has great impact on differentiation of this bacterium not  
34 restricted only to the transition towards sessile growth stage.

35

36 **Originality-Significance statement**

37 Understanding how versatile bacterial phenotypes influence each other is important for our basic  
38 understanding of microbial ecology. Our research highlights the novel intertwinement of bacterial  
39 differentiation and reveal how lack of single cell motility adjusts DNA exchange among bacterial  
40 strains.

41

## 42 Introduction

43 When facing stressful environmental conditions, bacteria can respond with a variety of post-  
44 exponential modifications including secretion of degradative enzymes, sporulation, or genetic  
45 competence. *Bacillus subtilis* is one of the bacterial species that are able to take up free DNA from  
46 the environment and incorporate it into its own genome, a phenomenon referred to as natural  
47 competence (Dubnau, 1991). To import extracellular DNA into *B. subtilis* cells, a pseudopilus formed  
48 by proteins encoded by the *comG* operon facilitates binding to the receptor protein ComEA, which is  
49 located in the bacterial cell membrane (Inamine and Dubnau, 1995; Chen *et al.*, 2005). As only single  
50 stranded DNA is imported, the membrane-associated nuclease NucA catalyzes cleavage of the DNA  
51 after successful binding (Provvedi *et al.*, 2001). Subsequent transport of the DNA through a  
52 membrane channel formed by the protein ComEC is mediated by the ATPase ComFA that probably  
53 requires the transmembrane proton motive force (Maier *et al.*, 2004).

54 To take up DNA, cells have to be in a developmental state, in which a specific set of genes and  
55 regulators are expressed (Dubnau, 1991; Berka *et al.*, 2002). Regulation of the whole apparatus  
56 required for competence development is complex. Briefly, entry into the competence state occurs in  
57 a bistable manner during the early stationary phase, where a minority of cells produces high level of  
58 the competence master regulator ComK above a certain threshold that is required to switch on  
59 competence development, the so called 'K-state' (van Sinderen *et al.*, 1995; Maamar and Dubnau,  
60 2005; Smits *et al.*, 2005; Dubnau and Losick, 2006). It was demonstrated that noise in the expression  
61 of *comK* determines the competent subpopulation and allows a dynamic stress response regarding  
62 competence development (Maamar *et al.*, 2007; Mugler *et al.*, 2016). Eventually, ComK activates the  
63 expression of late competence operons encoding the DNA-binding and -uptake machinery as well as  
64 genes, whose products are responsible for DNA integration (Berka *et al.*, 2002; Ogura *et al.*, 2002;  
65 Hamoen *et al.*, 2003). Increase of the ComK level is linked to a quorum sensing-mediated  
66 accumulation of the small ComS protein, which interferes with ComK degradation during the  
67 exponential phase (Turgay *et al.*, 1998). ComK is able to bind the *comK* promoter, triggering its own  
68 transcription, thus creating an auto-stimulatory loop (van Sinderen and Venema, 1994). This binding  
69 is further stabilized by the non-phosphorylated form of the regulator DegU to increase the level of  
70 ComK above the threshold sufficient for competence development (Hamoen *et al.*, 2000).

71 However, DegU is not only crucial for competence initiation, but also involved in the regulation of  
72 many other processes including protease production, biofilm development, and, particularly,  
73 flagellar motility (Murray *et al.*, 2009; Mukherjee and Kearns, 2014). The main components of the  
74 hook and basal body of the flagellum are encoded by the large *fla/che* operon. Transcription of this  
75 operon is activated by a complex formed by the regulator SwrA and phosphorylated DegU (DegU~P),

76 which binds to one of the *fla/che* promoters (Mordini *et al.*, 2013; Mukherjee and Kearns, 2014).  
77 Amongst other genes, the operon contains the gene encoding the sigma factor  $\sigma^D$  that activates  
78 transcription of motility genes outside the *fla/che* operon like the *hag* gene (encoding flagellin),  
79 *motA* and *motB* (encoding flagellar stator proteins), as well as transcription of *lytF*, which is  
80 necessary for separation of motile cells after cell division (Serizawa *et al.*, 2004; Chen *et al.*, 2009).  
81 The level of  $\sigma^D$  and its position in the *fla/che* operon determines the cell fate, i.e. subpopulations of  
82 motile single cells or non-motile chains (Cozy and Kearns, 2010). The function of DegU~P changes in  
83 the absence of SwrA. In this case, DegU~P seems to inhibit motility via the same promoter of the  
84 *fla/che* operon (Amati *et al.*, 2004). Additionally, DegU~P can activate the anti-sigma factor FlgM by  
85 binding to its promoter region in the absence of SwrA (Hsueh *et al.*, 2011) allowing FlgM to  
86 antagonize  $\sigma^D$  (Caramori *et al.*, 1996). Consequently, DegU~P indirectly suppresses transcription of  
87  $\sigma^D$ -dependent genes (Hsueh *et al.*, 2011). It was suggested that a completion of flagellum assembly  
88 can be sensed by the DegSU two component system: FlgM, which is activated by DegU~P, causes  
89 inhibition of  $\sigma^D$ -dependent genes, when the assembly of the flagellum is impeded (Cozy and Kearns,  
90 2010; Hsueh *et al.*, 2011).

91 In addition to its role on modulating the expression of flagellum-related genes in *B. subtilis*, the  
92 phosphorylation and therefore the activity of DegU, has been shown to be influenced by a  
93 mechanical signal transmitted by the flagellum (Cairns *et al.*, 2013). Inhibition of flagellar rotation by  
94 the flagellar clutch or by tethering the flagella results in an increased DegU~P level in the cell.

95 In this study, we report a correlation between motility function and competence development,  
96 which in *B. subtilis* is connected by the multifunctional response regulator DegU. We show that  
97 mutants lacking a functional flagellum such as  $\Delta hag$ ,  $\Delta motA$ , and  $\Delta flgE$  exhibited a reduced  
98 transformation frequency. This was due to a decrease in competence gene expression, particularly  
99 reduced levels of the competence master regulator ComK, which can be reverted by overexpressing  
100 *comK* in the *hag* mutant. Finally, we suggest that the reduced transformation frequency was likely  
101 due to an imbalance in the phosphorylation level of DegU.

## 102 Results

103 *Lack of active flagella impairs competence for DNA uptake in B. subtilis.*

104 While genetically modifying various *B. subtilis* strains, a striking difference in transformation  
105 frequency was observed between the wild type and a non-motile mutant lacking the gene encoding  
106 flagellin, *hag*. To explore this phenomenon, we tested the transformability of wild type (strain 168)  
107 and *hag*-mutant in competence medium (see Experimental Procedures), where the *hag*-mutant  
108 showed a more than 100-fold reduced transformation frequency relative to the wild type (Fig. 1A,  
109 B): while the transformation frequency of the wild type ranged between  $3 \cdot 10^{-5}$  and  $5 \cdot 10^{-5}$ , that of the  
110 *hag*-mutant was reduced to values below  $3 \cdot 10^{-7}$ . Similarly, the undomesticated *B. subtilis* strains  
111 DK1042 (transformable derivative of NCIB 3610) and PS216 showed reduced transformation  
112 efficiency when the *hag* gene of these strains was disrupted (Fig. S1). To investigate whether this  
113 difference in transformation frequency between the two strains resulted from a lower growth rate  
114 of the *hag*-mutant, the growth behavior of wild type and *hag*-mutant grown in competence medium  
115 was evaluated over time. As depicted in Fig. 1B, the *hag*-mutant showed a clear growth advantage  
116 and reached a higher OD compared to the wild type (unpaired two-sample t-test with Welch  
117 Correction:  $P = 0.001$ ,  $n = 5$ ), thus supporting our previous observations (Hölscher *et al.*, 2015).  
118 Further, it was tested whether the addition of DNA at different time points would increase the  
119 transformation frequency of the *hag*-mutant. However, the mutant showed a consistently low  
120 transformation frequency over the course of several hours, indicating that a shifted timing of the  
121 initiation of the competence state is unlikely to be the reason for the observed decrease in  
122 transformation frequency (Fig. 1C). To test whether this phenomenon is restricted to the *hag*-  
123 mutant or connected to the lack of an active motility apparatus in general, mutants lacking other  
124 functional flagellum-related genes were investigated. The transformation frequencies of mutants  
125 lacking the gene encoding one of the flagellar motor units, *motA*, and the gene encoding the hook  
126 protein, *flgE*, were decreased in both cases compared to the wild type (Fig. 2; unpaired two-sample  
127 t-test with Welch Correction:  $P = 0.01$  for WT -  $\Delta motA$ ,  $P = 0.039$  for WT -  $\Delta flgE$ ,  $n = 9$  for both).  
128 Although the wild type transformation frequency was slightly different, the transformation  
129 frequencies of both  $\Delta motA$  and  $\Delta flgE$  were around 10-times lower than that of the wild type (Fig. 2).  
130 In contrast, a *cheA*-mutant lacking the main chemotaxis sensor kinase showed a similar  
131 transformation frequency than the wild type (Fig. S2; unpaired two-sample t-test with Welch  
132 Correction:  $P = 0.232$ ,  $n = 3$ ), suggesting that the presence of an active flagellum, but not directed  
133 motility *per se* is required for full competence development. In sum, these results demonstrate that  
134 the observed impaired competence is linked to a loss of flagellar function.

135

136 *Lack of competence in flagellar mutants is due to the reduced expression of competence genes.*

137 To determine if the detected diminished transformation frequency of flagellar mutants was due to  
138 altered competence gene expression, the fluorescent reporter  $P_{comG}$ -*gfp* was introduced into these  
139 strains. This reporter allows the detection of cells expressing the *comG* operon-encoding genes  
140 required for pseudopilus formation and DNA uptake. In addition, this reporter provides a proxy on  
141 the activity of the ComK protein, the master regulator of competence. Qualitative microscopy  
142 analyses of cultures harboring the reporter, and which were grown in competence medium for 5 h,  
143 showed indeed a decreased number of fluorescent (i.e. *comG* expressing) cells in the *hag* mutant  
144 compared to the wild type, whereas a control strain lacking *comK* showed no fluorescence (Fig. 3A).  
145 For quantitative determination of competence gene expression within the population, flow  
146 cytometric measurements were performed that revealed 24.7% of fluorescent cells in wild type  
147 cultures (mean value), but only 4.6% of fluorescent cells for the *hag*-mutant (Fig. 3B, C; unpaired  
148 two-sample t-test with Welch Correction:  $P = 0.004$ ,  $n = 3$ ), thus confirming the microscopy results.  
149 Similarly, the *motA* and *flgE* mutants were analyzed microscopically as well as by using flow  
150 cytometry. Both methods revealed fewer cells activated transcription of competence genes in these  
151 mutants compared to the wild type (Fig. 4; unpaired two-sample t-test with Welch Correction:  $P =$   
152  $0.017$  for WT -  $\Delta motA$ ,  $P = 1.3 \cdot 10^{-9}$  for WT -  $\Delta flgE$ ,  $n = 3$  for both; mean percentage of fluorescent  
153 cells: 16.7% for wild type, 4.5% for  $\Delta motA$ , 4.2% for  $\Delta flgE$ ). Flow cytometry measurements at  
154 different time points during growth in competence medium confirmed a similarly reduced fraction of  
155 competent cells in the *hag* mutant compared to the wild type strain (Fig. S3).

156

157 *Reduced competence in hag mutant can be rescued by overexpression of comK.*

158 The reduced competence gene expression in the tested flagellar mutants suggested a regulatory link  
159 between flagellar motility and competence. To investigate if regulatory elements upstream of *comK*  
160 were responsible for our observations and if a bypass of those could therefore rescue  
161 transformation frequency in the flagellar mutant, we examined a strain with an additional copy of  
162 *comK* under the control of a xylose-inducible promoter ( $P_{xyI}$ -*comK*). Indeed, in combination with  $P_{xyI}$ -  
163 *comK*, the transformation level of the *hag* mutant increased back to a level that was statistically  
164 indistinguishable from wild type levels (mean transformation frequency of  $5.3 \cdot 10^{-6}$  for the wild type  
165 and  $8.5 \cdot 10^{-6}$  for  $\Delta hag P_{xyI}$ -*comK*; Kruskal-Wallis test:  $P = 0.453$ ,  $n = 9$ , Fig. 5A). Despite this observed  
166 increase in the *hag* strain upon *comK* overexpression, the wild type strain, which contained an  
167 inducible copy of *comK* showed a higher transformation frequency (Fig. 5A, Kruskal-Wallis test:  $P =$   
168  $3.4 \cdot 10^{-4}$  for WT - WT  $P_{xyI}$ -*comK*,  $P = 3.4 \cdot 10^{-4}$  for WT  $P_{xyI}$ -*comK* -  $\Delta hag P_{xyI}$ -*comK*,  $n = 9$  for both), which

169 was probably due to higher levels of *comK* transcription at the native locus as previously observed  
170 (Hahn *et al.*, 1996).

171

172 *Reduced competence in flagellar mutants is likely connected to unbalanced DegU phosphorylation.*

173 As the above results suggested that regulatory elements in response to impaired flagellar motility  
174 are responsible for the decreased *comK* expression, we investigated DegU as a likely candidate  
175 causing the reduced competence in flagellar mutants. As non-phosphorylated DegU was implicated  
176 to be required for *comK* transcription (Dahl *et al.*, 1992; Hamoen *et al.*, 2000), two variants of *degU*  
177 were tested: *degU32*, which harbors a mutation resulting in an extended half-life and thus higher  
178 stability of the phosphorylated form of the DegU protein (DegU~P), and *degU146*, which is cannot be  
179 phosphorylated (Dahl *et al.*, 1991; Dahl *et al.*, 1992; Kunst *et al.*, 1994). Both variants were tested in  
180 wild type as well as the  $\Delta$ *hag* background to observe differences in transformability compared to the  
181 wild type strain. The results of this experiment indicated that the transformation frequency of the  
182 *degU32* strain was slightly decreased (Figure 5B), which is consistent with previous publications,  
183 suggesting that non-phosphorylated DegU is required for priming *comK* transcription. The observed  
184 difference, however, was only marginally significant in our experimental setup (Figure 5B; Kruskal-  
185 Wallis test:  $P = 0.078$ ,  $n = 6$ ). Surprisingly, when combined with the  $\Delta$ *hag* mutation, the  
186 transformability of *degU32* increased significantly far above wild type levels, despite presumably  
187 possessing low levels of non-phosphorylated DegU to induce the ComK auto-stimulatory loop (Fig.  
188 5B; Kruskal-Wallis test:  $P = 0.004$ ,  $n = 6$ ). Furthermore, we observed a tendency towards a reduced  
189 albeit non-significant transformation frequency in the *degU146* strain compared to the wild type  
190 (Fig. 5B; Kruskal-Wallis test:  $P > 0.05$ ,  $n = 6$ ). This result was similar to the one observed for *degU32*,  
191 although no negative impact on transformability was expected in strain *degU146* due to the  
192 abolished phosphorylation of DegU. Interestingly, the *degU146* strain combined with the  $\Delta$ *hag*  
193 mutation exhibited transformation frequencies at the same level than the wild type strain (Fig. 5B;  
194 Kruskal-Wallis test:  $P > 0.05$ ,  $n = 6$ ) that was significantly higher than the transformation frequency of  
195 the single *degU146* mutant (Fig. 5B; Kruskal-Wallis test,  $P = 0.007$ ,  $n = 6$ ). These results suggest that  
196 altering the phosphorylation state of DegU in flagellar mutants can revert the negative impact on  
197 competence, which was caused by a lack of motility.

198

199 *Increased viscosity enhances competence in B. subtilis*

200 A recent study showed that restricting the flagellar rotation by viscous medium results in induction  
201 of flagellar gene transcription and activation of the DegSU two-component system in *Paenibacillus*  
202 sp. NAIST15-1 (Kobayashi *et al.*, 2017). Accordingly, we tested whether an increased viscosity of the

203 medium changes the transformability in *B. subtilis*. Indeed, the average transformation frequency of  
204 the wild type strain was three-fold higher in a medium of increased viscosity. The corresponding  
205 statistical test, however, indicated only a trend towards a statistically significant difference (Fig. 6;  
206 unpaired two-sample t-test:  $P = 0.095$ ,  $n = 4$ ).  
207



## 208 Discussion

209 Many cellular processes in *B. subtilis* are tightly connected through their underlying regulatory  
210 networks. Examples include motility and biofilm formation or biofilm formation and sporulation  
211 (e.g. Vlamakis *et al.*, 2013; Marlow *et al.*, 2014; Hölscher *et al.*, 2015). Here, we report an additional  
212 connection between flagellar motility and competence development. We could show that mutants  
213 with impaired flagellar function have defects in competence development. Such mutants displayed a  
214 considerably lower transformation frequency and expression of late competence genes, suggesting  
215 that it is due to an altered expression of the competence master regulator gene *comK*. The rescue  
216 experiment with an inducible *comK* confirmed that indeed competence could be rescued in the  $\Delta hag$   
217 strain, since  $\Delta hag$  P<sub>xyI</sub>-*comK* exhibited a wild type transformation level.

218 In a recently published study, similar effects were observed even though different methods have  
219 been used: Diethmaier and colleagues found that the expression of *comK* is lower in deletion  
220 mutants of the *fla/che* operon, *hag*, and the second stator gene *motB* (Diethmaier *et al.*, 2017).  
221 While in their study the expression of *comK* was primarily monitored using a *comK* promoter fusion,  
222 our experiments predominantly assayed transformation frequency. Both studies, however, report a  
223 negative effect of the deletion of flagellar components on competence development. The extent to  
224 which wild type and mutant differ in competence development is in the same order of magnitude  
225 between the studies: for example Diethmaier *et al.* observe a 10-fold reduced number of *comG*  
226 expressing-cells in  $\Delta hag$  (Diethmaier *et al.*, 2017), whereas our flow cytometry experiments showed  
227 a slightly lower, 5-fold reduction. Additionally, by investigating the transformation frequency in a  
228 *cheA* mutant, we could also show that the chemotactic response does not seem to have an influence  
229 on competence development.

230 Investigating modified variants of the response regulator DegU, we found that the transformation  
231 frequency of the *hag*-mutant could be restored to wild type level when the mutant carried a non-  
232 phosphorylatable DegU variant (*degU146*). This result suggests that a high level of DegU~P in the  
233 flagellar mutants was the reason for the decreased expression of the competence genes and *comK*,  
234 which could be counteracted by introducing a non-phosphorylatable variant of DegU. By additionally  
235 investigating a strain harboring a *degU-yfp* fusion, Diethmaier *et al.* also suggested an increased level  
236 of DegU~P to be present in the *hag*-mutant (Diethmaier *et al.*, 2017), which is consistent with our  
237 conclusions. In addition, the authors detected a reduced expression of *comK* in a strain with the  
238 *degU32* variant, which produces a form of DegU~P with higher stability (Diethmaier *et al.*, 2017).  
239 Comparable results were obtained by Msadek *et al.*, who found that high levels of DegU~P inhibit  
240 competence (Msadek *et al.*, 1990). We observed a similar, although weak statistical trend towards a  
241 reduced transformation frequency in *degU32* strain. Miras and Dubnau (2016) have recently

242 highlighted that differences in the DegU phosphorylation pathway among diverse *B. subtilis* isolates  
243 were likely responsible for variance in DNA transformation efficiency among certain domesticated  
244 and undomesticated strains. Moreover, slight differences in competence induction levels could also  
245 be affected by strain-specific characteristics. For example, *B. subtilis* 168 strains derived from  
246 different laboratories can exhibit striking variations in biofilm robustness (Gallegos-Monterrosa *et*  
247 *al.*, 2016). As suggested by Diethmaier and colleagues, the reduced transformation frequency in  
248 *degU32* might be caused by the high DegU~P levels of this strain. However, the *degU32* strain  
249 exhibits a non-motile phenotype and in the undomesticated strains DegU32 is not able to interact  
250 with SwrA at the P<sub>A</sub> promoter of the *fla/che* operon (*swrA* is inactive in domesticated strains),  
251 leading to repression of P<sub>A</sub> (*fla/che*) (Amati *et al.*, 2004; Mordini *et al.*, 2013). Due to low or no  
252 expression of the basic flagellar genes, this phenotype could mimic the situation observed in the  
253 flagellar mutants. In addition, we observed an increased transformation frequency when the *hag*  
254 gene was deleted from the *degU32* background. This is in contrast to the model assuming that  
255 increased levels of phosphorylated DegU in the cells lowers competence. Therefore, it is possible  
256 that yet unidentified factors are also involved in connecting motility and competence development  
257 that might be independent of DegU~P. At this point however, we cannot provide a reasonable  
258 explanation for the increased transformation frequency of  $\Delta$ *hag degU32*.

259 Interestingly, induction of competence state has negative impact on motility in *B. subtilis*. ComK  
260 negatively controls *hag* gene expression by stimulating the transcription of *comFA-C* operon and the  
261 downstream located anti-sigmaD factor coding gene, *flgM* (Liu and Zuber, 1998). This feedback loop  
262 presents another intriguing connection between these two cellular processes.

263 Diethmaier *et al.* proposed that increased DegU~P and lower *comK* expression in the flagellar  
264 mutants and in a strain with straight flagella was caused by a lower viscous load (Diethmaier *et al.*,  
265 2017). In line with this report, we also observed that higher viscosity in the medium resulted in an  
266 increased transformation frequency. Nevertheless, a possible role of the DegSU two-component  
267 system in sensing incomplete assembly of flagella and dysfunction as suggested previously (Hsueh *et*  
268 *al.*, 2011; Cairns *et al.*, 2013) could also explain the increased DegU~P levels in the flagellar mutants.

269 Together, our results identify a connection between two major physiological processes, providing  
270 another example of the complexity of intracellular regulatory networks and the vast amount of tasks  
271 a single regulator can cover.

272

273

## 274 **Experimental Procedures**

### 275 *Strains and cultivating conditions*

276 The strains used in this study and their mutant derivatives are listed in Table S1. Mutants  
277 constructed in this study were obtained by natural transformation of a *B. subtilis* receptor strain with  
278 genomic DNA from a donor strain. Strain TB831 was created by transformation of strain 168 P<sub>xyI</sub>-  
279 *comK* with genomic DNA of strain GP902 (J. Stülke lab collection). To obtain strains TB926 and  
280 TB925, genomic DNA of strain 168 P<sub>comG</sub>-*gfp* was used to transform strain TB710 and TB689,  
281 respectively. Strain TB928 was obtained by transforming strain 168 P<sub>xyI</sub>-*comK* with genomic DNA of  
282 GP901 (J. Stülke lab collection). To create strain TB935 and TB936, strain 168 was transformed with  
283 genomic DNA obtained from strain QB4371 (Kunst *et al.*, 1994) and QB4458 (Dahl *et al.*, 1991),  
284 respectively. Their derivatives harbouring also a mutation of *hag* (TB923 and TB924) were created by  
285 transformation with genomic DNA, which was obtained from GP901. In-frame deletions of *motA*,  
286 *flgE*, and *cheA* were created using plasmids pEC1, pDP306, and pDP338, respectively, as previously  
287 described (Courtney *et al.*, 2012; Chan *et al.*, 2014; Calvo and Kearns, 2015). Strains were verified by  
288 fluorescence microscopy (P<sub>comG</sub>-*gfp* reporter), PCR (*hag* mutants), or sequencing (*degU* variants),  
289 using the oligonucleotides listed in Table S2. For experiments with strains harboring the inducible  
290 construct P<sub>xyI</sub>-*comK*, 1% of xylose (final concentration) was added for induction (see van den Esker *et*  
291 *al.*, 2017). To increase medium viscosity, 10% Ficoll400 (Carl Roth) was added to the medium before  
292 culture inoculation and the mix was vortexed vigorously for ca 20 s.

293

### 294 *Transformation frequency assay*

295 To assess the transformation frequency of different strains, a modified version of the transformation  
296 protocol from Konkol *et al.* (2013) was used. 1 ml of each culture grown in 3 ml Lysogeny broth (LB)  
297 medium (LB-Lennox, Carl Roth; 10 g L<sup>-1</sup> tryptone, 5 g L<sup>-1</sup> yeast extract, and 5 g L<sup>-1</sup> NaCl) for 16 h was  
298 centrifuged for 2 min at 11,000 x g. The pellet was washed twice in de-ionized water and was re-  
299 suspended in 100 µl de-ionized water. The re-suspended culture was diluted (1:80) in complete  
300 competence medium (MC: 1,8 ml de-ionized water, 6.7 µl 1M MgSO<sub>4</sub>, 50 µl 0.2% L-Tryptophan, 200  
301 µl 10xMC; per 100 ml 10xMC: 14,036 g K<sub>2</sub>HPO<sub>4</sub> [x3H<sub>2</sub>O], 5,239 g KH<sub>2</sub>PO<sub>4</sub>, 20 g glucose, 10 ml 300 mM  
302 tri-sodium citrate, 1 ml 83.97 mM ammonium iron (III) citrate, 1 g casein hydrolysate, 2 g potassium  
303 glutamate [H<sub>2</sub>O]) and incubated at 37°C, 225 rpm. For experiments with strains harboring P<sub>xyI</sub>-*comK*,  
304 10x MC with fructose instead of glucose was used. After 6 h incubation time, 5 µl DNA with an  
305 antibiotic marker (PY79 *safA*::Tet gDNA, 60 ng/µl) was added to 500 µl culture. Any alteration in  
306 incubation time before addition of the DNA is indicated in the results section. Each culture was  
307 incubated for 30 min, then 500 µl fresh LB medium was added and the culture was incubated for

308 another 1 h under the conditions mentioned above. Serial dilutions of cultures supplemented with  
309 DNA were prepared and plated on LB medium supplemented with 1.5 % agar to determine the  
310 number of colony forming units (cfu). Additionally, 50  $\mu$ l and 100  $\mu$ l undiluted cultures  
311 supplemented with gDNA as well as controls were plated on tetracycline (Tet) containing LB-agar  
312 plates (10  $\mu$ g ml<sup>-1</sup> Tet) to determine the number of transformant colonies. The transformation  
313 frequency was calculated by dividing the number of transformants per ml by cfu per ml.

314

#### 315 *Growth curve experiments*

316 To examine growth properties, cultures were inoculated in LB medium from frozen glycerol stocks  
317 and incubated for ca. 16 h at 37°C shaking at 225 rpm. Cultures were diluted 1:100 in 200  $\mu$ l fresh  
318 completed MC medium (see above) and the OD<sub>590nm</sub> was recorded for 16 h using a TECAN Infinite  
319 F200 PRO microplate reader. The cultures were incubated with orbital shaking with a duration of  
320 800 s and an amplitude of 3 mm at 37°C and the OD<sub>590</sub> was measured every 15 min.

321

#### 322 *Fluorescence microscopy*

323 Strains were investigated using a confocal laser scanning microscope (LSM 780, Carl Zeiss) equipped  
324 with an argon laser and a Plan-Apochromat/1.4 Oil DIC M27 63 $\times$  objective. Cultures were grown  
325 prior microscopy for 5 h (if not indicated otherwise) in competence medium under the same  
326 conditions as described above (see section transformation frequency assay). Excitation of the  
327 fluorescent reporter (GFP) was performed at 488nm and the emitted fluorescence was recorded at  
328 493-598nm. For image visualization, Zen 2012 software (Carl Zeiss) was used, brightness and  
329 contrast were adjusted equally in all images.

330

#### 331 *Flow cytometry*

332 Flow cytometric measurements were performed using a Partec CyFlow<sup>®</sup> Space (Sysmex Partec  
333 GmbH, Germany), which was equipped with a solid-state laser for excitation of green/yellow  
334 fluorescent proteins at 488 nm. Single cells were detected in forward and sideward scatter channels  
335 as well as in one fluorescent channel. A minimum of 40,000 cells were analyzed for the experiments.  
336 To define the background fluorescence signal, non-labelled *B. subtilis* cultures were analyzed as  
337 control. Cultures used for measurements were grown for 5 h (if not indicated otherwise) in  
338 competence medium under the same conditions as described above (see section transformation  
339 frequency assay). For evaluation of the data, the FlowJo<sup>®</sup> software (FlowJo LLC, Ashland, USA) was  
340 used and a gate was set at 3 fluorescence units for all samples to isolate the fluorescent population  
341 and determine the percentage of fluorescent cells.

342

343 *Statistics*

344 Statistical analyses were performed using OriginPro 2016 (V93E, OriginLab Northampton, USA).

345 Unpaired two-sample t-test with Welch Correction or a Kruskal-Wallis test was used to test for  
346 significant differences.

347

348 **Acknowledgement**

349 We thank Daniel Kearns for providing plasmids, Anne Richter for constructing the in-frame deletion  
350 mutants, and Tadeja Marin for initial observations. We thank Wiep Klaas Smits for his comment on  
351 our bioRxiv submission. This project was funded by grant KO4741/3-1 from the German Research  
352 Foundation (DFG). T.H. and A.D. were supported by International Max Planck Research School and  
353 Alexander von Humboldt foundation fellowships, respectively. CK was supported by the Volkswagen  
354 Foundation (I/85 290) as well as the German Research Foundation (SFB 944/2-2016, KO 3909/2-1).  
355 Á.T.K. was supported by a Startup fund from the Technical University of Denmark.

356

357 ***Conflict of interest.*** None declared

358 **References**

359

360 Amati, G., Bisicchia, P., and Galizzi, A. (2004) DegU-P represses expression of the motility *fla-che*  
361 operon in *Bacillus subtilis*. *J Bacteriol* **186**: 6003–6014.

362 Berka, R.M., Hahn, J., Albano, M., Draskovic, I., Persuh, M., Cui, X., *et al.* (2002) Microarray analysis  
363 of the *Bacillus subtilis* K-state: Genome-wide expression changes dependent on ComK. *Mol Microbiol*  
364 **43**: 1331–1345.

365 Cairns, L.S., Marlow, V.L., Bissett, E., Ostrowski, A., and Stanley-Wall, N.R. (2013) A mechanical signal  
366 transmitted by the flagellum controls signalling in *Bacillus subtilis*. *Mol Microbiol* **90**: 6–21.

367 Calvo, R.A., and Kearns, D.B. (2015) FlgM is secreted by the flagellar export apparatus in *Bacillus*  
368 *subtilis*. *J Bacteriol* **197**: 81–91.

369 Caramori, T., Barilla, D., Nessi, C., Sacchi, L., and Galizzi, A. (1996) Role of FlgM in sigma(D)-  
370 dependent gene expression in *Bacillus subtilis*. *J Bacteriol* **178**: 3113–3118.

371 Chan, J.M., Guttenplan, S.B., and Kearns, D.B. (2014) Defects in the flagellar motor increase synthesis  
372 of poly- $\gamma$ -glutamate in *Bacillus subtilis*. *J Bacteriol* **196**: 740–753.

373 Chen, I., Christie, P.J., and Dubnau, D. (2005) The ins and outs of DNA transfer in bacteria. *Science*  
374 **310**: 1456–1460.

375 Chen, R., Guttenplan, S.B., Blair, K.M., and Kearns, D.B. (2009) Role of the  $\sigma$ D-dependent autolysins  
376 in *Bacillus subtilis* population heterogeneity. *J Bacteriol* **191**: 5775–5784.

377 Courtney, C.R., Cozy, L.M., and Kearns, D.B. (2012) Molecular characterization of the flagellar hook in  
378 *Bacillus subtilis*. *J Bacteriol* **194**: 4619–4629.

379 Cozy, L.M., and Kearns, D.B. (2010) Gene position in a long operon governs motility development in  
380 *Bacillus subtilis*. *Mol Microbiol* **76**: 273–285.

381 Dahl, M.K., Msadek, T., Kunst, F., and Rapoport, G. (1991) Mutational analysis of the *Bacillus subtilis*  
382 DegU regulator and its phosphorylation by the DegS protein kinase. *J Bacteriol* **173**: 2539–2547.

383 Dahl, M.K., Msadek, T., Kunst, F., and Rapoport, G. (1992) The phosphorylation state of the DegU  
384 response regulator acts as a molecular switch allowing either degradative enzyme synthesis or  
385 expression of genetic competence in *Bacillus subtilis*. *J Biol Chem* **267**: 14509–14514.

386 Diethmaier, C., Chawla, R., Canzoneri, A., Kearns, D.B., and Dubnau, D. (2017) Viscous drag on the  
387 flagellum activates *Bacillus subtilis* entry into the. *Mol Microbiol* **106**: 367-380.

388 Dubnau, D. (1991) Genetic competence in *Bacillus subtilis*. *Microbiol Rev* **55**: 395–424.

389 Dubnau, D., and Losick, R. (2006) Bistability in bacteria. *Mol Microbiol* **61**: 564–572.

390 van den Esker, M.H., Kovács, Á.T., and Kuipers, O.P. (2017) YsbA and LytST are essential for pyruvate  
391 utilization in *Bacillus subtilis*. *Environ Microbiol* **19**: 83–94.

- 392 Gallegos-Monterrosa, R., Mhatre, E., and Kovács, Á.T. (2016) Specific *Bacillus subtilis* 168 variants  
393 form biofilms on nutrient-rich medium. *Microbiol* **162**: 1922–1932.
- 394 Hamoen, L.W., Venema, G., and Kuipers, O.P. (2003) Controlling competence in *Bacillus subtilis*:  
395 shared use of regulators. *Microbiol* **149**: 9–17.
- 396 Hamoen, L.W., Werkhoven, a F. Van, Venema, G., and Dubnau, D. (2000) The pleiotropic response  
397 regulator DegU functions as a priming protein in competence development in *Bacillus subtilis*. *Proc*  
398 *Natl Acad Sci U S A* **97**: 9246–9251.
- 399 Hölscher, T., Bartels, B., Lin, Y.-C., Gallegos-Monterrosa, R., Price-Whelan, A., Kolter, R., *et al.* (2015)  
400 Motility, chemotaxis and aerotaxis contribute to competitiveness during bacterial pellicle biofilm  
401 development. *J Mol Biol* **427**: 3695–3708.
- 402 Hsueh, Y.H., Cozy, L.M., Sham, L.T., Calvo, R.A., Gutu, A.D., Winkler, M.E., and Kearns, D.B. (2011)  
403 DegU-phosphate activates expression of the anti-sigma factor FlgM in *Bacillus subtilis*. *Mol Microbiol*  
404 **81**: 1092–1108.
- 405 Inamine, G.S., and Dubnau, D. (1995) ComEA, a *Bacillus subtilis* integral membrane protein required  
406 for genetic transformation, is needed for both DNA binding and transport. *J Bacteriol* **177**: 3045–  
407 3051.
- 408 Kobayashi, K., Kanesaki, Y., and Yoshikawa, H. (2017) Surface sensing for flagellar gene expression on  
409 solid media in *Paenibacillus sp.* NAIST15-1. *Appl Environ Microbiol* **83**: e00585-17.
- 410 Konkol, M.A., Blair, K.M., and Kearns, D.B. (2013) Plasmid-encoded comI inhibits competence in the  
411 ancestral 3610 strain of *Bacillus subtilis*. *J Bacteriol* **195**: 4085–4093.
- 412 Kunst, F., Msadek, T., Bignon, J., and Rapoport, G. (1994) The DegS/DegU and ComP/ComA two-  
413 component systems are part of a network controlling degradative enzyme synthesis and  
414 competence in *Bacillus subtilis*. *Res Microbiol* **145**: 393–402.
- 415 Liu, J., and Zuber, P. (1998) A molecular switch controlling competence and motility: competence  
416 regulatory factors ComS, MecA, and ComK control sigmaD-dependent gene expression in *Bacillus*  
417 *subtilis*. *J Bacteriol* **180**: 4243–4251.
- 418 Maamar, H., and Dubnau, D. (2005) Bistability in the *Bacillus subtilis* K-state (competence) system  
419 requires a positive feedback loop. *Mol Microbiol* **56**: 615–24.
- 420 Maamar, H., Raj, A., and Dubnau, D. (2007) Noise in Gene Expression Determines. *Science* 526–529.
- 421 Maier, B., Chen, I., Dubnau, D., and Sheetz, M.P. (2004) DNA transport into *Bacillus subtilis* requires  
422 proton motive force to generate large molecular forces. *Nat Struct Mol Biol* **11**: 643–649.
- 423 Marlow, V.L., Porter, M., Hogley, L., Kiley, T.B., Swedlow, J.R., Davidson, F. a, and Stanley-Wall, N.R.  
424 (2014) Phosphorylated DegU manipulates cell fate differentiation in the *Bacillus subtilis* biofilm. *J*  
425 *Bacteriol* **196**: 16–27.



- 426 Miras, M., and Dubnau, D. (2016) A DegU-P and DegQ-Dependent Regulatory Pathway for the K-  
427 state in *Bacillus subtilis*. *Front Microbiol* **7**: 1–14.
- 428 Mordini, S., Osera, C., Marini, S., Scavone, F., Bellazzi, R., Galizzi, A., and Calvio, C. (2013) The Role of  
429 SwrA, DegU and PD3 in *fla/che* Expression in *B. subtilis*. *PLoS One* **8**: e85065.
- 430 Msadek, T., Kunst, F., Henner, D., Klier, A., Rapoport, G., and Dedonder, R. (1990) Signal transduction  
431 pathway controlling synthesis of a class of degradative enzymes in *Bacillus subtilis*: expression of the  
432 regulatory genes and analysis of mutations in *degS* and *degU*. *J Bacteriol* **172**: 824–834.
- 433 Mugler, A., Kittisopikul, M., Hayden, L., Liu, J., Wiggins, C.H., Süel, G.M., and Walczak, A.M. (2016)  
434 Noise expands the response range of the *Bacillus subtilis* competence circuit. *PLoS Comput Biol* **12**:  
435 1–21.
- 436 Mukherjee, S., and Kearns, D.B. (2014) The structure and regulation of flagella in *Bacillus subtilis*.  
437 *Annu Rev Genet* **48**: 319–40.
- 438 Murray, E.J., Kiley, T.B., and Stanley-Wall, N.R. (2009) A pivotal role for the response regulator DegU  
439 in controlling multicellular behaviour. *Microbiol* **155**: 1–8.
- 440 Ogura, M., Yamaguchi, H., Kobayashi, K., Ogasawara, N., and Fujita, Y. (2002) Whole-genome analysis  
441 of genes regulated by the *Bacillus subtilis* competence transcription factor ComK. *J Appl Microbiol*  
442 **184**: 2344–2351.
- 443 Proveddi, R., Chen, I., and Dubnau, D. (2001) NucA is required for DNA cleavage during  
444 transformation of *Bacillus subtilis*. *Mol Microbiol* **40**: 634–644.
- 445 Serizawa, M., Yamamoto, H., Yamaguchi, H., Fujita, Y., Kobayashi, K., Ogasawara, N., and Sekiguchi, J.  
446 (2004) Systematic analysis of SigD-regulated genes in *Bacillus subtilis* by DNA microarray and  
447 Northern blotting analyses. *Gene* **329**: 125–136.
- 448 van Sinderen, D., Luttinger, A., Kong, L., Dubnau, D., Venema, G., and Hamoen, L. (1995) *comK*  
449 encodes the competence transcription factor, the key regulatory protein for competence  
450 development in *Bacillus subtilis*. *Mol Microbiol* **15**: 455–462.
- 451 van Sinderen, D., and Venema, G. (1994) ComK acts as an autoregulatory control switch in the signal  
452 transduction route to competence in *Bacillus subtilis*. *J Bacteriol* **176**: 5762–5770.
- 453 Smits, W.K., Eschevins, C.C., Susanna, K.A., Bron, S., Kuipers, O.P., and Hamoen, L.W. (2005) Stripping  
454 *Bacillus*: ComK auto-stimulation is responsible for the bistable response in competence  
455 development. *Mol Microbiol* **56**: 604–614.
- 456 Turgay, K., Hahn, J., Burghoorn, J., and Dubnau, D. (1998) Competence in *Bacillus subtilis* is  
457 controlled by regulated proteolysis of a transcription factor. *EMBO J* **17**: 6730–6738.
- 458 Vlamakis, H., Chai, Y., Beauregard, P., Losick, R., and Kolter, R. (2013) Sticking together: building a  
459 biofilm the *Bacillus subtilis* way. *Nat Rev Microbiol* **11**: 157–68.
- 460

461 **Figures**

462

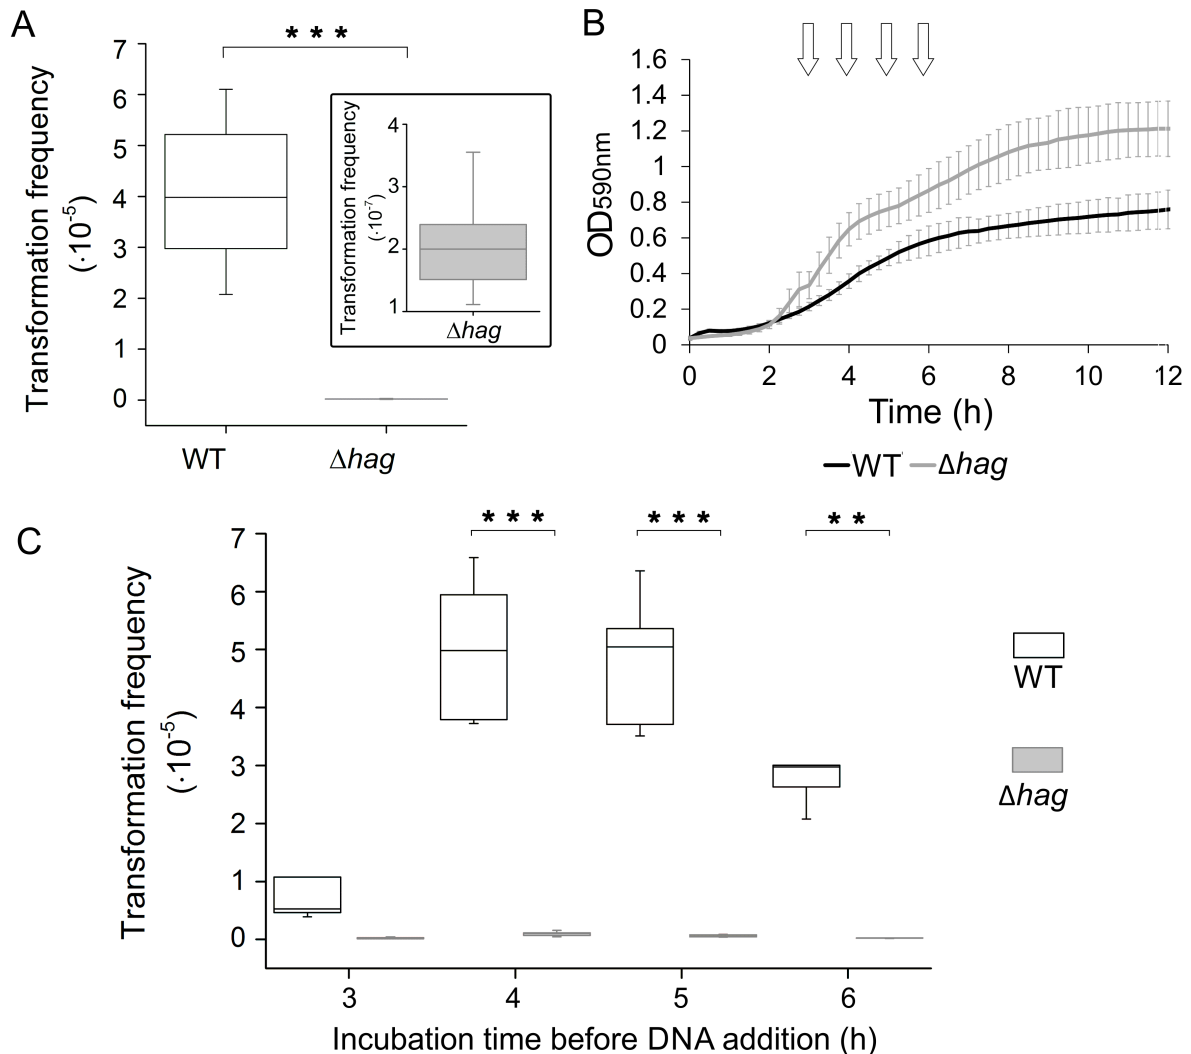

463

464 **Fig. 1.** Transformation frequency is reduced in a mutant lacking flagellin protein. (A) Transformation  
 465 frequency of *B. subtilis* wild type and *hag*-mutant after 6 h incubation in competence medium  
 466 (unpaired two-sample t-test with Welch Correction:  $P = 3.1 \cdot 10^{-5}$ ,  $n = 9$ ). The inset shows a zoom-in of  
 467 the *hag*-mutant data. (B) Growth dynamics of wild type and *hag*-mutant during 12 h incubation in  
 468 competence medium. Standard deviations for the measurements are depicted in light grey  
 469 (unpaired two-sample t-test with Welch Correction:  $P = 0.001$ ,  $n = 5$ ). Arrows indicate the time  
 470 points of DNA addition to investigate the transformation frequency over time, which is shown as  
 471 box-and-whisker plot in (C). The line in the boxes represents the median, the box indicates the 25<sup>th</sup>-  
 472 75<sup>th</sup> percentile. Asterisks indicate statistically significant differences between wild type and *hag*-  
 473 mutant (unpaired two-sample t-test with Welch Correction for WT -  $\Delta hag$ ;  $P = 0.125$  for 3 h,  $P < 0.01$   
 474 for 4 h, 5 h, 6 h;  $n = 6$ ).

475

476

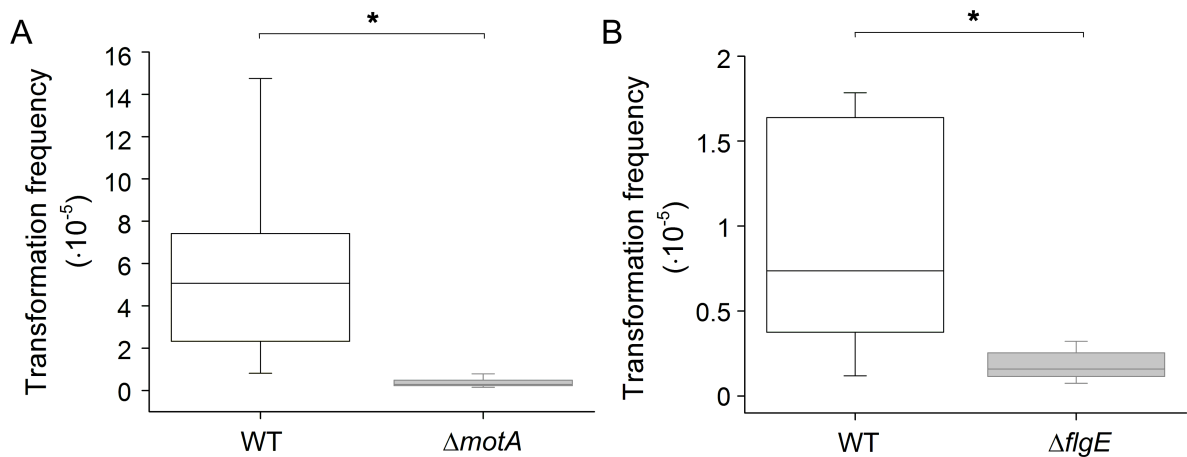

477

478 **Fig. 2.** Mutants impaired in flagellar function exhibit lower transformation frequencies. Deletion of  
479 the gene encoding a flagellar stator (*motA*; A) or the gene encoding the hook protein (*flgE*; B) results  
480 in significantly lower transformation frequency of the respective strain compared to the wild type  
481 after incubation in competence medium for 6 h. The line in the boxes represents the median, the  
482 box indicates 25<sup>th</sup>-75<sup>th</sup> percentile. Asterisks indicate statistically significant differences (unpaired  
483 two-sample t-test with Welch Correction: P = 0.01 for  $\Delta motA$ ; P = 0.039 for  $\Delta flgE$ ; n = 9 for all).

484

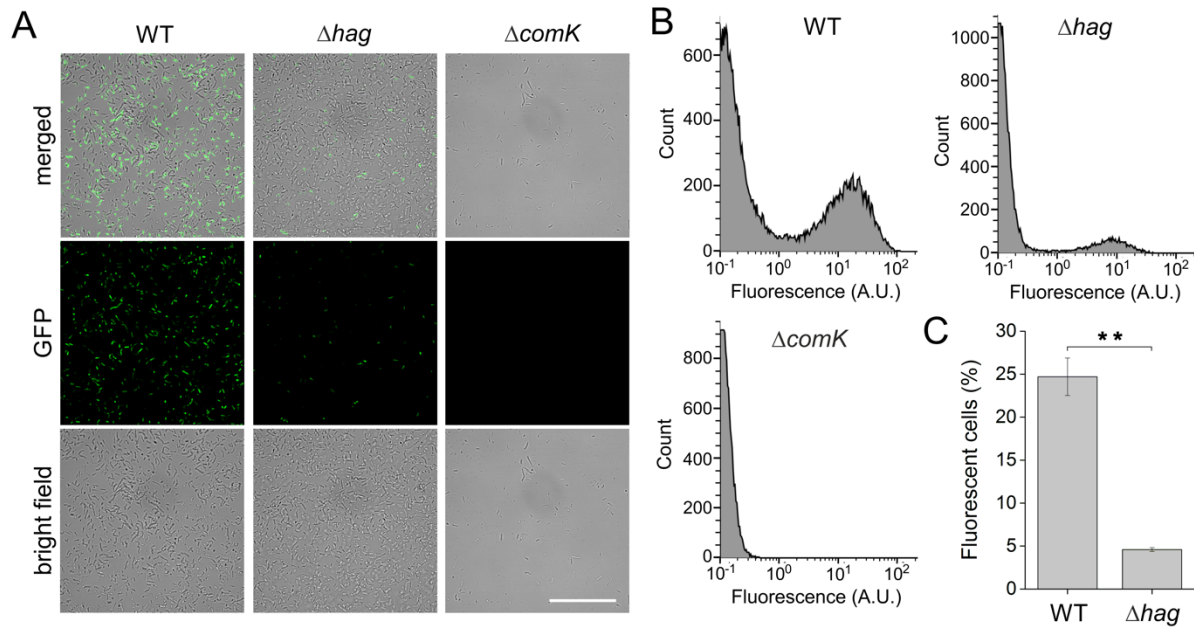

485

486

487 **Fig. 3.** Fewer cells of the *hag*-mutant express competence genes compared to the wild type. (A)

488 Representative microscopy images of strains harboring the  $P_{comG}$ -*gfp* reporter in wild type,  $\Delta hag$  or

489  $\Delta comK$  genetic background. Images were recorded after incubation in competence medium for 5 h.

490 The scale bar represents 50  $\mu$ m. (B) Histograms of flow cytometric measurements showing the cell

491 count and the fluorescence in arbitrary units for wild type,  $\Delta hag$ , and  $\Delta comK$  including background

492 fluorescence. Representative images are shown for each strain. (C) Percentage of fluorescent cells

493 determined from the data in (B) for wild type and *hag*-mutant by isolating the fluorescent

494 population with fluorescence intensities above 3 A.U. Asterisks indicate significant differences

495 (unpaired two-sample t-test with Welch Correction:  $P = 0.036$ ,  $n = 3$ ).

496

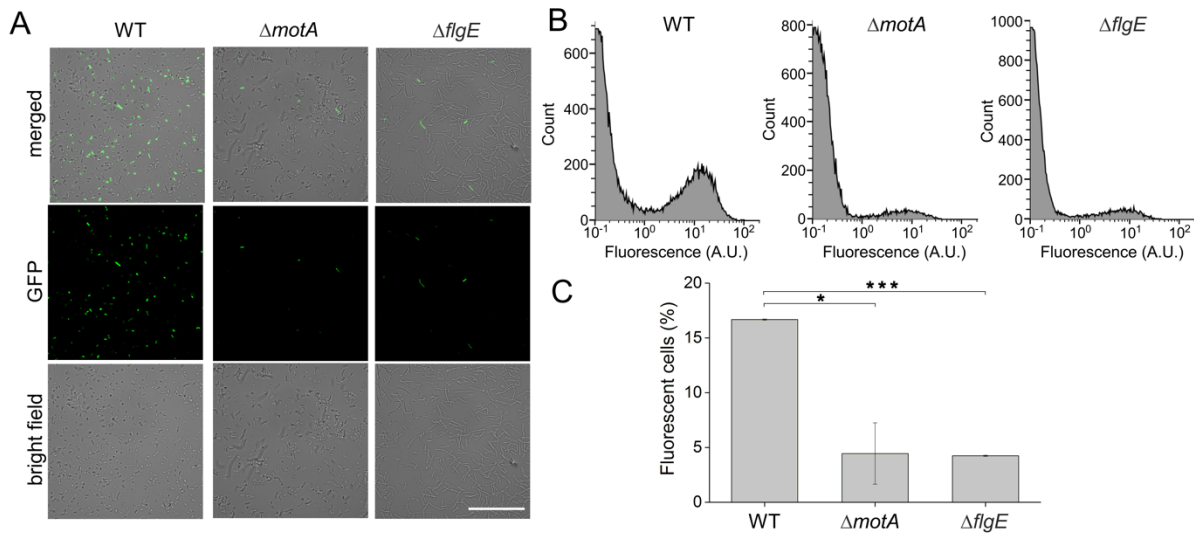

497

498

499 **Fig. 4.** Competence gene expression is reduced in mutants lacking a functional flagellum. (A)  
500 Representative microscopy images of strains harboring the  $P_{comG}$ -*gfp* reporter in wild type,  $\Delta motA$ , or  
501  $\Delta flgE$  genetic background. Images were recorded after 5 h incubation in competence medium. The  
502 scale bar represents 50  $\mu$ m. (B) Histograms of flow cytometric measurements showing the cell count  
503 and the fluorescence in arbitrary units for wild type,  $\Delta motA$  or  $\Delta flgE$ . Representative images are  
504 shown for each strain. (C) Percentage of fluorescent cells determined from the data in (B) by  
505 isolating the fluorescent population with fluorescence intensities above 3 A.U. showing a significant  
506 difference (asterisks) between wild type and  $\Delta motA$  ( $P = 0.017$ ) as well as wild type and  $\Delta flgE$  ( $P <$   
507  $0.001$ ) with  $n = 3$  for both (unpaired two-sample t-test with Welch Correction).

508

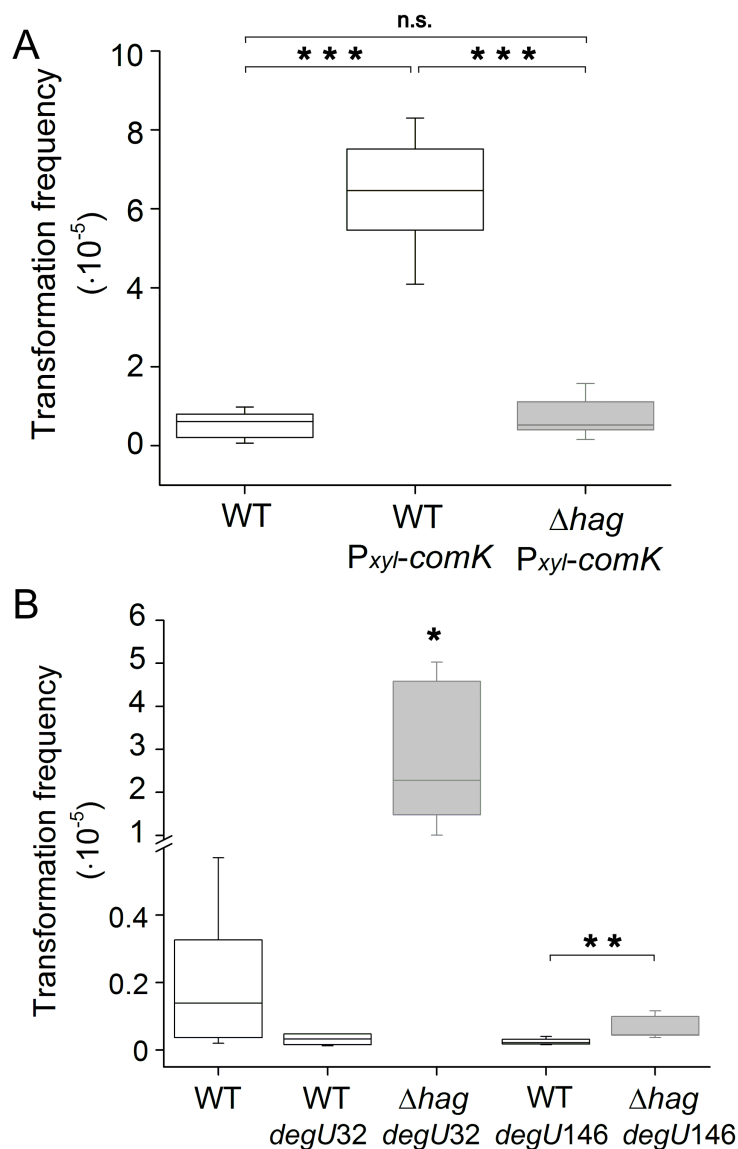

509

510

511 **Fig. 5.** Synthetically induced *comK* and *degU146* increase competence of  $\Delta hag$ . (A) Transformation  
 512 frequencies of wild type compared to strains harboring a xylose-inducible copy of *comK* ( $P_{xyl-comK}$ )  
 513 with wild type or  $\Delta hag$  genetic background (Kruskal-Wallis test for WT - WT  $P_{xyl-comK}$ :  $P = 3.4 \cdot 10^{-4}$ ;  
 514 for WT  $P_{xyl-comK}$  -  $\Delta hag$   $P_{xyl-comK}$ :  $P = 3.4 \cdot 10^{-4}$ ,  $n = 9$  for both). (B) Transformation frequencies of WT  
 515 compared to strains harboring either a phosphorylated DegU variant (*degU32*) or a non-  
 516 phosphorylatable DegU variant (*degU146*) in wild type or  $\Delta hag$  background. Strain  $\Delta hag$  *degU32* is  
 517 significantly different from all other strains (Kruskal-Wallis test:  $P < 0.05$  for all,  $n=6$ ). The line in the  
 518 boxes represents the median, the box indicates 25<sup>th</sup>-75<sup>th</sup> percentile. Asterisks indicate statistically  
 519 significant differences (Kruskal-Wallis test:  $P = 0.007$ ,  $n=6$ ).

520

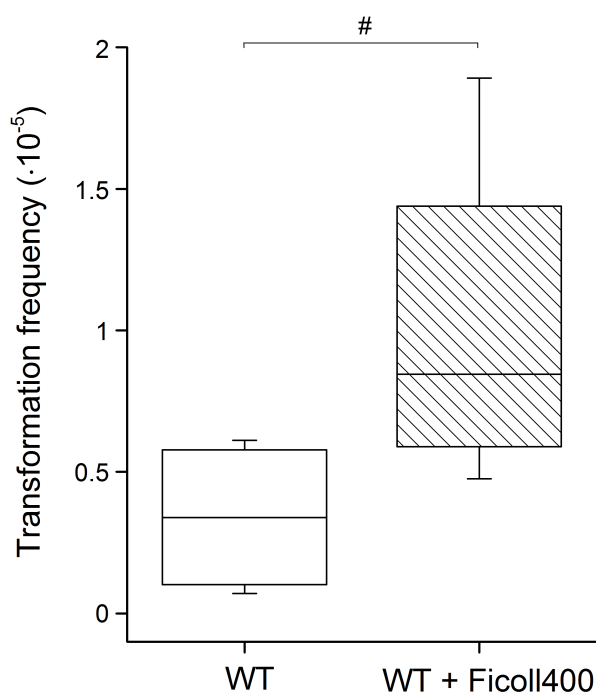

521

522

523 **Fig. 6.** Competence is improved in viscous medium. Transformation frequency of the wild type strain  
524 grown in normal competence medium and in medium with increased viscosity. The line in the boxes  
525 represents the median, the box indicates 25<sup>th</sup>-75<sup>th</sup> percentile, # indicates marginally significant  
526 differences (unpaired two-sample t-test:  $P = 0.095$ ,  $n = 4$ ).

527
